# Supplementary material for: Substantial health and economic burden of COVID-19 during the year after acute illness among US adults at high risk of severe COVID-19
Source: Springer Nature journal article supplement (doi:10.1186/s12916-023-03234-6), 2024-02-01
Supplement: MOESM1 [file 26687846]

## Additional Files

**Table S1. Reasons for Exclusion From the Study**

| Cohort Selection Step                                                                                                                                            | N          | %     |
|------------------------------------------------------------------------------------------------------------------------------------------------------------------|------------|-------|
| All patients enrolled in database during April 2020–May 2020                                                                                                     | 16,909,650 | 100   |
| and with $\geq 1$ ICD-10 diagnosis of confirmed COVID-19 in any position                                                                                         | 70,924     | 0.419 |
| and exclude patients with an ICD-10 code for confirmed COVID-19 (U07.1) before April 1, 2020 (preindex)                                                          | 68,297     | 0.404 |
| and with continuous enrollment 12 months (360 days) before the index date (45-day gap)                                                                           | 50,463     | 0.298 |
| and with continuous enrollment 13 months (390 days) after the index date (45-day gap)                                                                            | 32,551     | 0.192 |
| and aged $\geq 18$ at the index date                                                                                                                             | 32,054     | 0.190 |
| and without any LTCF/SNF/inpatient rehab/hospice claim before or at the index date                                                                               | 23,458     | 0.139 |
| and exclude patients admitted earlier than 5 days before IP index COVID-19 diagnosis                                                                             | 23,392     | 0.138 |
| and alive in the data/no death <sup>a</sup> code at 30 days after the COVID-19 diagnosis date (index date)                                                       | 23,350     | 0.138 |
| and has $\geq 1$ characteristic or condition (within 12 months before COVID-19 diagnosis - excluding index date) associated with higher risk for severe COVID-19 | 19,558     | 0.116 |

ICD-10: International Classification of Diseases, 10th Revision; LTCF=long-term care facility, SNF=skilled nursing facility.

<sup>a</sup>There is no accurate date of death available, only month and year of death, so it was approximated to the last day of the month.
