# Supplementary material for: Substantial health and economic burden of COVID-19 during the year after acute illness among US adults at high risk of severe COVID-19
Source: Springer Nature journal article supplement (doi:10.1186/s12916-023-03234-6), 2024-02-01
Supplement: MOESM2 [file 26687846]

**Table S2. Diagnoses of the Respiratory System During the Baseline and Post-Acute Phases in the Overall Population (N=19,558)<sup>a</sup>**

| ICD-10-CM Diagnosis Description                                   | ICD-10-CM Diagnosis Code | Baseline Phase, n (%) | Post-Acute Phase, n (%) | Change From Baseline to Post-Acute Phase, Δ (% Change) |
|-------------------------------------------------------------------|--------------------------|-----------------------|-------------------------|--------------------------------------------------------|
| Other respiratory diseases principally affecting the interstitium | J80–J84                  | 562 (2.9)             | 898 (4.6)               | 336 (59.8)                                             |
| Other diseases of pleura                                          | J90–J94                  | 484 (2.5)             | 695 (3.6)               | 211 (43.6)                                             |
| Other diseases of the respiratory system                          | J95–J99                  | 1873 (9.6)            | 2447 (12.5)             | 574 (30.6)                                             |
| Influenza and pneumonia                                           | J09–J18                  | 2325 (11.9)           | 2431 (12.4)             | 106 (4.6)                                              |
| Chronic lower respiratory diseases                                | J40–J47                  | 4178 (21.4)           | 4056 (20.7)             | –122 (–2.9)                                            |
| Other diseases of upper respiratory tract                         | J30–J39                  | 3591 (18.4)           | 3201 (16.4)             | –390 (–10.9)                                           |
| Acute upper respiratory infections                                | J00–J06                  | 5926 (30.3)           | 2569 (13.1)             | –3357 (–56.6)                                          |
| Other acute lower respiratory infections                          | J20–J22                  | 1918 (9.8)            | 589 (3.0)               | –1329 (–69.3)                                          |

ICD-10-CM, International Classification of Diseases, Tenth Revision, *Clinical Modification*.

<sup>a</sup>The baseline phase was the 12 months before the index date, and the post-acute phase spanned from 1 to 13 months after the index date
