# Supplementary material for: Substantial health and economic burden of COVID-19 during the year after acute illness among US adults at high risk of severe COVID-19
Source: Springer Nature journal article supplement (doi:10.1186/s12916-023-03234-6), 2024-02-01

Figure S1. Percentage change from the baseline phase to the post-acute phase in frequency of ICD-10-CM “diseases of the respiratory system” in the overall population (N=19,558). Diagnosis codes shown include those applicable to  $\geq 2\%$  of the baseline population. ICD-10, International Classification of Diseases, Tenth Revision, *Clinical Modification*.

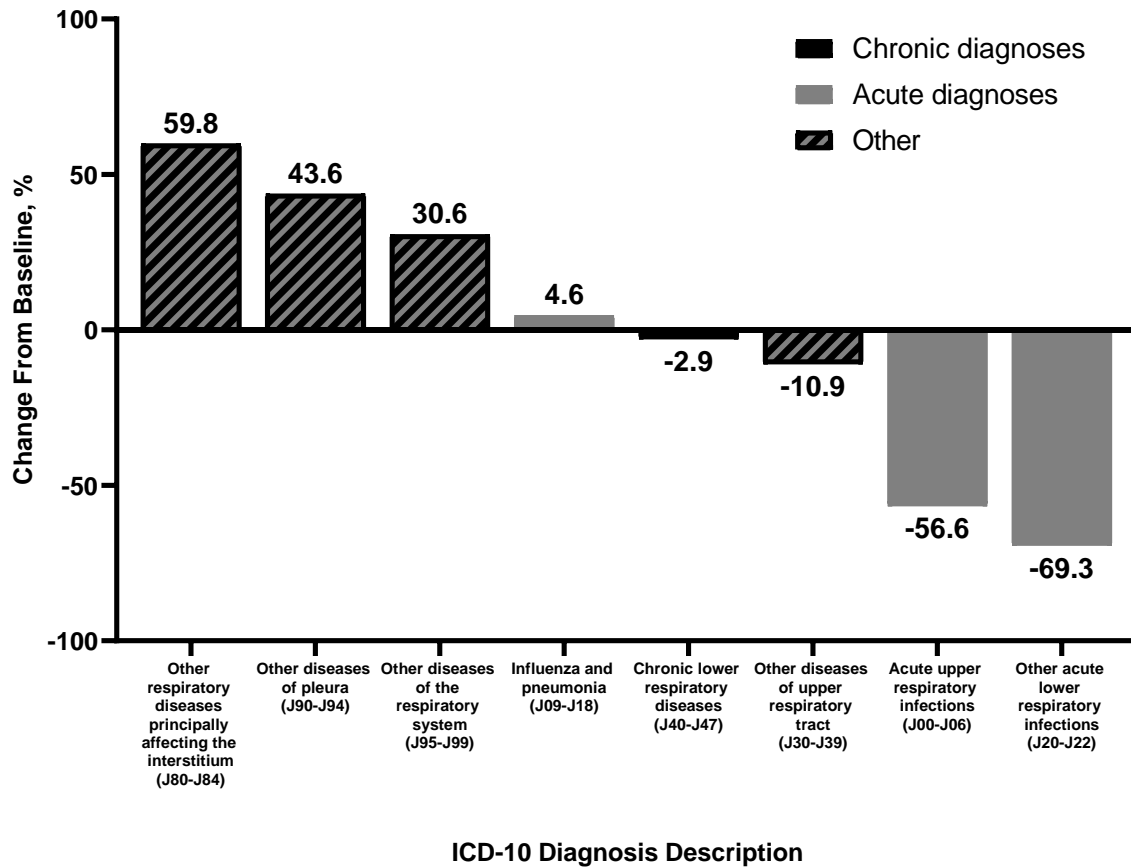

Supplement: MOESM3 [file 26687846]
