# Supplementary material for: Substantial health and economic burden of COVID-19 during the year after acute illness among US adults at high risk of severe COVID-19
Source: Springer Nature journal article supplement (doi:10.1186/s12916-023-03234-6), 2024-02-01
Supplement: MOESM4 [file 26687846]

**Table S3. Medication Prescriptions During the Baseline and Post-Acute Phases in the Overall Population (N=19,558)<sup>a</sup>**

| USC Medication Class Description   | Baseline Phase,<br>n (%) | Post-Acute Phase,<br>n (%) | Change From Baseline to           |
|------------------------------------|--------------------------|----------------------------|-----------------------------------|
|                                    |                          |                            | Post-Acute Phase,<br>Δ (% Change) |
| Vitamins                           | 771 (3.9)                | 1137 (5.8)                 | 366 (47.5)                        |
| Miscellaneous preparations         | 831 (4.2)                | 1147 (5.9)                 | 316 (38.0)                        |
| Blood factors                      | 675 (3.5)                | 888 (4.5)                  | 213 (31.6)                        |
| Hemostatic modifiers               | 2093 (10.7)              | 2719 (13.9)                | 626 (29.9)                        |
| Nutrients & supplements            | 980 (5.0)                | 1246 (6.4)                 | 266 (27.1)                        |
| Cardiac agents                     | 1203 (6.2)               | 1485 (7.6)                 | 282 (23.4)                        |
| Antineoplastic targeted therapy    | 536 (2.7)                | 644 (3.3)                  | 108 (20.1)                        |
| Thyroid therapy                    | 2222 (11.4)              | 2553 (13.1)                | 331 (14.9)                        |
| Neurologic/neuromuscular disorders | 3790 (19.4)              | 4271 (21.8)                | 481 (12.7)                        |
| Gastrointestinal                   | 5002 (25.6)              | 5595 (28.6)                | 593 (11.9)                        |
| Psychotherapeutic drugs            | 5876 (30.0)              | 6530 (33.4)                | 654 (11.1)                        |
| Diagnostic aids                    | 3288 (16.8)              | 3652 (18.7)                | 364 (11.1)                        |
| Genitourinary                      | 3352 (17.1)              | 3668 (18.8)                | 316 (9.4)                         |
| Antihyperlipidemic agents          | 7831 (40.0)              | 8510 (43.5)                | 679 (8.7)                         |
| Diabetes therapy                   | 4264 (21.8)              | 4623 (23.6)                | 359 (8.4)                         |
| Antiseptics                        | 669 (3.4)                | 723 (3.7)                  | 54 (8.1)                          |
| Diuretics and aquaretics           | 3843 (19.6)              | 4144 (21.2)                | 301 (7.8)                         |
| Hospital solutions                 | 883 (4.5)                | 950 (4.9)                  | 67 (7.6)                          |
| Laxatives                          | 1150 (5.9)               | 1236 (6.3)                 | 86 (7.5)                          |
| Vascular agents                    | 9800 (50.1)              | 10,361 (53.0)              | 561 (5.7)                         |
| Nondrug products                   | 713 (3.6)                | 753 (3.9)                  | 40 (5.6)                          |
| Musculoskeletal                    | 2817 (14.4)              | 2949 (15.1)                | 132 (4.7)                         |
| Dermatologicals                    | 1544 (7.9)               | 1595 (8.2)                 | 51 (3.3)                          |
| Contraceptives                     | 649 (3.3)                | 670 (3.4)                  | 21 (3.2)                          |

|                                          |               |             |               |
|------------------------------------------|---------------|-------------|---------------|
| Antifungal agents                        | 2530 (12.9)   | 2610 (13.3) | 80 (3.2)      |
| Anesthetics                              | 1129 (5.8)    | 1160 (5.9)  | 31 (2.7)      |
| Sedatives & hypnotics                    | 894 (4.6)     | 910 (4.7)   | 16 (1.8)      |
| Amebicide/trichomonacides/antibacterials | 596 (3.0)     | 606 (3.1)   | 10 (1.7)      |
| Analgesics                               | 5083 (26.0)   | 5140 (26.3) | 57 (1.1)      |
| Antiarthritics                           | 5321 (27.2)   | 5361 (27.4) | 40 (0.8)      |
| Ophthalmic preparations                  | 2735 (14.0)   | 2701 (13.8) | -34 (-1.2)    |
| Hormones                                 | 7814 (40.0)   | 6965 (35.6) | -849 (-10.9)  |
| Allergy/cold preparations                | 960 (4.9)     | 850 (4.3)   | -110 (-11.5)  |
| Antinauseants                            | 2670 (13.7)   | 2328 (11.9) | -342 (-12.8)  |
| Respiratory therapy                      | 5889 (30.1)   | 5033 (25.7) | -856 (-14.5)  |
| Anti-infectives, systemic                | 10,284 (52.6) | 7857 (40.2) | -2427 (-23.6) |
| Antivirals                               | 1994 (10.2)   | 1188 (6.1)  | -806 (-40.4)  |
| Antimalarials                            | 527 (2.7)     | 240 (1.2)   | -287 (-54.5)  |
| Cough/cold/flu preparations              | 1929 (9.9)    | 508 (2.6)   | -1421 (-73.7) |

USC, Uniform System of Classification.

<sup>a</sup>The baseline phase was the 12 months before the index date, and the post-acute phase spanned from 1 to 13 months after the index date.
