# Supplementary material for: Substantial health and economic burden of COVID-19 during the year after acute illness among US adults at high risk of severe COVID-19
Source: Springer Nature journal article supplement (doi:10.1186/s12916-023-03234-6), 2024-02-01
Supplement: MOESM5 [file 26687846]

**Table S4. Hospital Discharge Status During Baseline and Post-Acute Phases<sup>a</sup> in the Overall Population and Stratified by Age**

|                                                                   | All Patients<br>(N=19,558) |                     |                                                              | Patients Aged 18–64 Years<br>(n=9381) |                     |                                                              | Patients Aged ≥65 Years<br>(n=10,177) |                     |                                                              |
|-------------------------------------------------------------------|----------------------------|---------------------|--------------------------------------------------------------|---------------------------------------|---------------------|--------------------------------------------------------------|---------------------------------------|---------------------|--------------------------------------------------------------|
|                                                                   | Baseline<br>Phase          | Post-Acute<br>Phase | Change From Baseline<br>to Post-Acute Phase,<br>Δ (% Change) | Baseline<br>Phase                     | Post-Acute<br>Phase | Change From Baseline<br>to Post-Acute Phase,<br>Δ (% Change) | Baseline<br>Phase                     | Post-Acute<br>Phase | Change From Baseline<br>to Post-Acute Phase,<br>Δ (% Change) |
| Hospitalizations, n                                               | 3642                       | 5301                |                                                              | 1314                                  | 1528                |                                                              | 2328                                  | 3773                |                                                              |
| Discharge status, n (%)                                           |                            |                     |                                                              |                                       |                     |                                                              |                                       |                     |                                                              |
| Discharged to home or self-care                                   | 2589 (71.1)                | 2529 (47.7)         | −60 (−2.3)                                                   | 1037 (78.9)                           | 1019 (66.7)         | −18 (−1.7)                                                   | 1552 (66.7)                           | 1510 (40.0)         | −42 (−2.7)                                                   |
| Discharged to home under care of home health service organization | 711 (19.5)                 | 1106 (20.9)         | 395 (55.6)                                                   | 108 (8.2)                             | 169 (11.1)          | 61 (56.5)                                                    | 603 (25.9)                            | 937 (24.8)          | 334 (55.4)                                                   |
| Discharged to other facility <sup>b</sup>                         | 202 (5.5)                  | 985 (18.6)          | 783 (387.6)                                                  | 61 (4.6)                              | 159 (10.4)          | 98 (160.7)                                                   | 141 (6.1)                             | 826 (21.9)          | 685 (485.8)                                                  |
| Left against medical advice or discontinued care                  | 48 (1.3)                   | 75 (1.4)            | 27 (56.3)                                                    | 31 (2.4)                              | 34 (2.2)            | 3 (9.7)                                                      | 17 (0.7)                              | 41 (1.1)            | 24 (141.2)                                                   |
| Still patient/transferred within institution                      | 8 (0.2)                    | 451 (8.5)           | 443 (5538)                                                   | 5 (0.4)                               | 58 (3.8)            | 53 (1060)                                                    | 3 (0.1)                               | 393 (10.4)          | 390 (13,000.0)                                               |
| Unknown status                                                    | 84 (2.3)                   | 155 (2.9)           | 71 (84.5)                                                    | 72 (5.5)                              | 89 (5.8)            | 17 (23.6)                                                    | 12 (0.5)                              | 66 (1.7)            | 54 (450.0)                                                   |

Percentages were calculated in relation to the total number of hospital discharges within the cohort during the specified time frame.

<sup>a</sup>The baseline phase was the 12 months before the index date, and the post-acute phase spanned from 1 to 13 months after the index date.

<sup>b</sup>Includes short-term general hospital, skilled nursing facility, intermediate care facility, federal healthcare facility, home hospice, medical facility hospice, inpatient rehabilitation facility, long-term care hospital, nursing facility certified under Medicare, psychiatric hospital or psychiatric distinct part/unit of a hospital, critical access hospital, or other type of healthcare institution.
